# Supplementary material for: The Balance-Scale Task Revisited: A Comparison of Statistical Models for Rule-Based and Information-Integration Theories of Proportional Reasoning
Source: PLOS journal article supplement (doi:10.1371/journal.pone.0136449), 2015-10-27
Supplement: S1 (10.1371/journal.pone.0136449.s001) [file journal.pone.0136449.s001]

### S1 Text

**The estimation of the weighted-sum rule is based on the optimization of the following set of equations, for each subject.** First, the person vector  $\theta_p$  is based on the implicit weight for the number-of-blocks ( $\alpha_p > .5$ ) or distance ( $\alpha_p < .5$ ) dimension and on the characteristics of the item set:

$$\begin{aligned} \theta_p &= (\alpha_p w_l + (1 - \alpha_p) d_l) - (\alpha_p w_r + (1 - \alpha_p) d_r) \\ &= \alpha_p \Delta w_i + (1 - \alpha_p) \Delta d_i. \end{aligned}$$

Based on the scaled  $\theta_p$  ( $\sigma = 1$ ), and assuming a normal density to express the response probabilities, the log-likelihood of the response vector can be expressed as follows (person subscripts are dropped):

$$\begin{aligned} \log L(\theta, C) &= \sum_{i=1}^I (R_i = l) \log \int_{-\infty}^{-C-\theta_i} \frac{1}{\sqrt{2\pi}} e^{-\frac{(x-\theta_i)^2}{4}} dx + \\ & (R_i = b) \log \int_{\infty}^{C-\theta_i} \frac{1}{\sqrt{2\pi}} e^{-\frac{(x-\theta_i)^2}{4}} dx - \log \int_{\infty}^{-C-\theta_i} \frac{1}{\sqrt{2\pi}} e^{-\frac{(x-\theta_i)^2}{4}} dx + \\ & (R_i = r) \log \int_{C-\theta_i}^{\infty} \frac{1}{\sqrt{2\pi}} e^{-\frac{(x-\theta_i)^2}{4}} dx, \end{aligned}$$

where the indicator terms,  $R_i = l, b, r$ , are one if the response is respectively left, balance or right and zero otherwise.

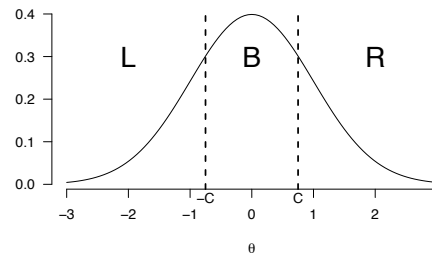

**Figure A.** The response probabilities expressed by the weighted-sum rule.

S1 Fig A shows a visual representation of these response probabilities. The set of functions is optimized with respect to  $\alpha$  and  $C$ , using a constrained optimization implemented with the optim-function in Cran-R [41].  $\alpha$  is constrained between zero and one, and  $C$  higher than zero. Note that [13] also propose an implicit multiplication rule that can capture RIV. However it is not possible to estimate the parameters of this rule since the likelihood function is zero if  $\alpha$  is zero, hence this rule will not be further studied.
